# Supplementary figures and images for: Quetiapine monotherapy in bipolar II depression: combined data from four large, randomized studies
Source: Springer Nature journal article supplement (doi:10.1186/2194-7511-1-10), 2013-07-04

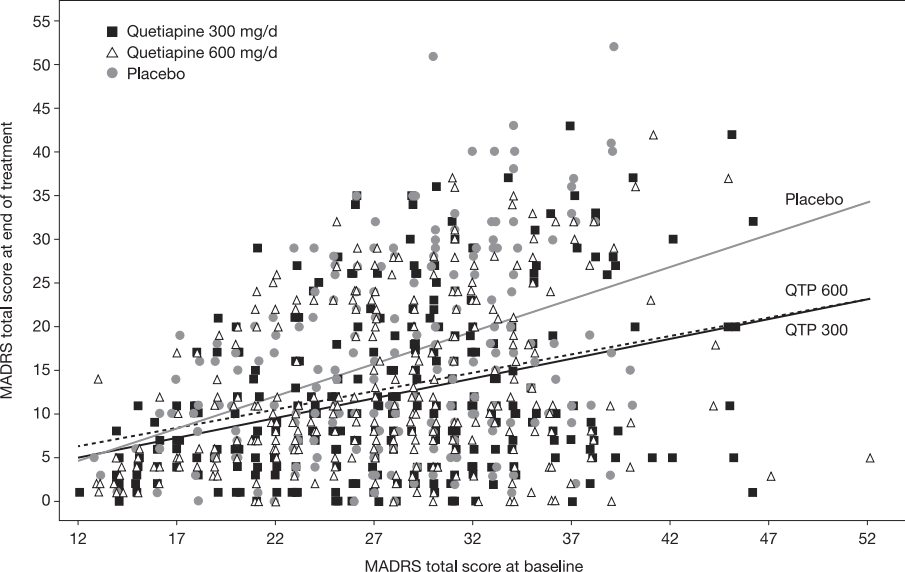

Supplement: 40345_2013_12_MOESM4_ESM.pdf [file 40345_2013_12_MOESM4_ESM.pdf]
